# Supplementary material
Source: Springer Nature journal article supplement (https://www.springermedizin.de/resource/supplementary/12875_2008_317_MOESM2_ESM.pdf/9436736)
Supplement: MOESM2 [file 9436736]

## ***Direct benefits***

- Increased awareness of patients with MUS
- Altered perceptions of patients with MUS
- Greater confidence in treating patients with MUS
- Reflection on management of patients with MUS

## ***Indirect benefits***

- Comparing consultation skills
- Cross-over into chronic disease management
